# Supplementary material for: The Efficacy of Preventing Portal Hypertension and Treating Cirrhosis Decompensation Due to Hepatitis B with Fuzheng Huayu Tablets, Entecavir and Carvedilol: study protocol for a multicenter randomized controlled trial
Source: Research Square preprint supplement (doi:10.21203/rs.3.rs-3264667/v1), 2023-11-08
Supplement: Supplementary file 1 [file cd069d8e23bcb848177275af.pdf]

上海中医药大学附属曙光医院伦理委员会  
IRB of Shuguang Hospital affiliated with Shanghai University of TCM  
关于“中西医结合防治乙型肝炎肝硬化门脉高压及其失代偿发生的临床研究”  
伦理审查意见

**Notification of IRB Meeting Minutes**

项目编号：2017-560-43

项目名称：中西医结合防治乙型肝炎肝硬化门脉高压及其失代偿发生的临床研究

项目来源：上海申康医院发展中心/重大疾病临床技能提升项目

研究负责单位：上海中医药大学附属曙光医院

主要研究者：肝二科 刘成海

研究参加单位：复旦大学附属中山医院、上海交通大学医学院附属瑞金医院、上海中医药大学附属龙华医院、上海市公共卫生临床中心、上海中医药大学

审查日期：2018-10-31

审查地点：曙光东院圆桌会议室

审查类型：修正案审查

审查方式：会议审查

审查委员：马俊坚、顾翠峰、朱惠蓉、高月求、朱梅萍、樊民胜、黄建平、张洪芬、鲍培伦、卢根娣

审查文件：

1. 修正方案伦理审查申请表；
2. 临床研究方案（版本号：3.0，版本日期：2018年9月24日）；
3. 知情同意书（版本号：3.0，版本日期：2018年9月24日）；
4. 研究病历\_方案一（版本号：3.0，版本日期：2018年9月24日）；
5. 研究病历\_方案二（版本号：3.0，版本日期：2018年9月24日）；
6. 招募广告（版本号：3.0，版本日期：2018年9月24日）。

审查意见：

根据我国国家食品药品监督管理局《药物临床试验伦理审查工作指导原则》（2010）、《药物临床试验质量管理规范》（2003）、世界医学会《赫尔辛基宣言》、以及国际医学科学组织委员会《人体生物医学研究国际道德指南》等的伦理原则，经本伦理委员会审查决定：

同意。

请对研究方案、知情同意书等相应文件作上述修改/补充，并将修改/补充后的文件提交伦理委员会审查批准后执行。如对审查意见有不同观点，请书面向伦理委员会主任委员反映。

委员会主席签字：

日期：2018-10-31

上海中医药大学附属曙光医院伦理委员会（盖章）

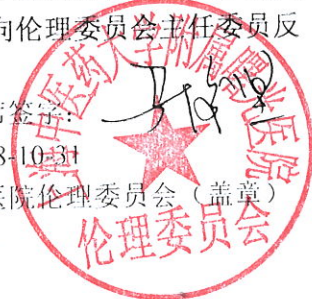

## 会议签到表

### Sign-in Sheet of Full Board Meeting

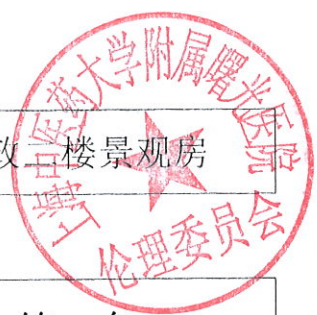

|      |            |      |          |
|------|------------|------|----------|
| 会议日期 | 2018.10.31 | 会议地点 | 东院行政楼景观房 |
|------|------------|------|----------|

伦理委员会到会委员签名:

| 姓名  | 性别 | 专业情况  | 签名  |
|-----|----|-------|-----|
| 马俊坚 | 女  | 医学    | 马俊坚 |
| 顾翠峰 | 女  | 管理学   | 顾翠峰 |
| 黄建平 | 男  | 医学    | 黄建平 |
| 朱惠蓉 | 女  | 医学    | 朱惠蓉 |
| 鲍培伦 | 男  | 法学    | 鲍培伦 |
| 刘力  | 女  | 药学    | 请假  |
| 张洪芬 | 女  | 社区代表  | 张洪芬 |
| 樊民胜 | 男  | 医学伦理学 | 樊民胜 |
| 高月求 | 男  | 医学    | 高月求 |
| 朱梅萍 | 女  | 医学    | 朱梅萍 |
| 卢根娣 | 女  | 护理学   | 卢根娣 |
