# Supplementary material for: The Efficacy of Preventing Portal Hypertension and Treating Cirrhosis Decompensation Due to Hepatitis B with Fuzheng Huayu Tablets, Entecavir and Carvedilol: study protocol for a multicenter randomized controlled trial
Source: Research Square preprint supplement (doi:10.21203/rs.3.rs-3264667/v1), 2023-11-08
Supplement: Supplementary file 2 [file fb1d2d9262f9f0dda7ebd6c5.pdf]

## 附件： 第一轮促进市级医院临床技能与临床创新三年行动计划立项清单

单位：万元

| 序号 | 项目编号      | 项目名称                                                                                           | 承担单位     | 项目负责人 | 专项资助 | 计划进度                |
|----|-----------|------------------------------------------------------------------------------------------------|----------|-------|------|---------------------|
| 1  | 16CR1001A | EGFR敏感突变晚期非鳞非小细胞肺癌一线吉非替尼对照吉非替尼联合化疗或抗血管生成治疗的II期多中心、随机、对照研究                                      | 肺科医院     | 周彩存   | 200  | 2016.12.1-2019.6.30 |
| 2  | 16CR1002A | 应用RGT(Response-Guided Therapy)策略对HBeAg阳性慢性乙型肝炎患者使用核苷类似物后联合使用聚乙二醇干扰素a-2a的有效性和安全性的前瞻、随机、开放、多中心研究 | 瑞金医院     | 谢青    | 200  | 2016.12.1-2019.6.30 |
| 3  | 16CR1003A | 中国儿童肝移植术后免疫抑制剂个体化用药的多中心临床研究                                                                    | 仁济医院     | 夏强    | 200  | 2016.12.1-2019.6.30 |
| 4  | 16CR1004A | 单纯激素对比激素联合MTX治疗中重度活动期甲状腺相关眼病的多中心临床研究                                                           | 第九人民医院   | 范先群   | 200  | 2016.12.1-2019.6.30 |
| 5  | 16CR1005A | 先天性耳聋早期双侧人工耳蜗植入的多中心临床研究                                                                        | 第九人民医院   | 吴皓    | 200  | 2016.12.1-2019.6.30 |
| 6  | 16CR1006A | 2型糖尿病常用口服降糖药的精准医学研究                                                                            | 市第六人民医院  | 贾伟平   | 200  | 2016.12.1-2019.6.30 |
| 7  | 16CR1007A | 选择性无创激光技术阻抑婴幼儿期静脉畸形的前瞻性、多中心、随机空白对照临床试验                                                         | 第九人民医院   | 林晓曦   | 200  | 2016.12.1-2019.6.30 |
| 8  | 16CR1008A | 高危pN0胸段食管鳞癌术后辅助化疗、辅助放疗与单纯手术治疗的多中心前瞻性随机对照临床研究                                                   | 胸科医院     | 方文涛   | 200  | 2016.12.1-2019.6.30 |
| 9  | 16CR1009A | 含多克隆抗T细胞抗体预处理方案的异基因造血干细胞移植治疗恶性T淋巴系统肿瘤：多中心、开放、随机对照临床研究                                          | 市第一人民医院  | 王椿    | 200  | 2016.12.1-2019.6.30 |
| 10 | 16CR1010A | 氟达拉滨联合阿糖胞苷(FA)与大剂量阿糖胞苷(HiDAC)巩固治疗核心结合因子急性髓细胞白血病多中心、开放、随机对照临床研究                                 | 市第一人民医院  | 宋献民   | 200  | 2016.12.1-2019.6.30 |
| 11 | 16CR1011A | 腹腔镜右半结肠癌标准化关键技术确立的临床比较研究                                                                       | 瑞金医院     | 郑民华   | 200  | 2016.12.1-2019.6.30 |
| 12 | 16CR1012A | 前瞻性、多中心、随机对照临床试验：应用靶向灌注导管靶病变给药改善急性心肌梗死患者介入术后心肌组织水平灌注                                           | 仁济医院     | 何奔    | 200  | 2016.12.1-2019.6.30 |
| 13 | 16CR1013A | 二甲双胍治疗系统性红斑狼疮的国际多中心、随机、双盲、安慰剂对照“双胞胎”临床研究                                                       | 仁济南院     | 叶霜    | 200  | 2016.12.1-2019.6.30 |
| 14 | 16CR1014A | 以“新产程”为核心的中国降低剖宫产体系建设和应用研究                                                                     | 市第一妇婴保健院 | 段涛    | 200  | 2016.12.1-2019.6.30 |
| 15 | 16CR1015A | 持续性房颤导管消融策略—前瞻性、多中心、随机对照研究                                                                     | 市第一人民医院  | 刘少稳   | 200  | 2016.12.1-2019.6.30 |

|    |           |                                                   |           |     |     |                     |
|----|-----------|---------------------------------------------------|-----------|-----|-----|---------------------|
| 16 | 16CR1016A | SBRT在驱动基因泛阴性多发转移IV期NSCLC应用的临床II期研究                | 胸科医院      | 傅小龙 | 200 | 2016.12.1-2019.6.30 |
| 17 | 16CR1017A | 针灸治疗膝骨性关节炎多中心临床研究                                 | 龙华医院      | 王拥军 | 200 | 2016.12.1-2019.6.30 |
| 18 | 16CR1018A | 抗反转录病毒治疗方案优化研究                                    | 市公共卫生临床中心 | 卢洪洲 | 200 | 2016.12.1-2019.6.30 |
| 19 | 16CR1019A | 祛湿化痰方治疗非酒精性脂肪肝的多中心临床研究                            | 曙光医院      | 胡义扬 | 200 | 2016.12.1-2019.6.30 |
| 20 | 16CR1020A | 关于建立下肢严重创伤评估系统的多中心研究                              | 市第六人民医院   | 柴益民 | 200 | 2016.12.1-2019.6.30 |
| 21 | 16CR1021A | 血液透析联合血液灌流治疗对维持性血液透析患者生存率影响的多中心、开放、随机、平行对照        | 新华医院      | 蒋更如 | 200 | 2016.12.1-2019.6.30 |
| 22 | 16CR1022A | 辅助生殖技术对母婴健康的影响：IVF出生队列研究和多中心、前瞻性、随机临床试验           | 仁济医院      | 孙贇  | 200 | 2016.12.1-2019.6.30 |
| 23 | 16CR1023A | 脊柱微调手法联合导引功法治疗腰椎间盘突出症的多中心临床研究                     | 岳阳中西医结合医院 | 房敏  | 200 | 2016.12.1-2019.6.30 |
| 24 | 16CR1024B | 完善慢加急性肝衰竭诊断标准的全国多中心、前瞻性、大样本临床研究                   | 仁济医院      | 李海  | 150 | 2016.12.1-2019.6.30 |
| 25 | 16CR1025B | 中医外治法为主综合方案治疗糖尿病性足病的临床研究                          | 龙华医院      | 阙华发 | 150 | 2016.12.1-2019.6.30 |
| 26 | 16CR1026B | 中西医结合防治乙肝肝硬化门脉高压及其失代偿发生的临床研究                      | 曙光医院      | 刘成海 | 150 | 2016.12.1-2019.6.30 |
| 27 | 16CR1027B | 艾拉莫德治疗活动性狼疮肾炎多中心临床研究                              | 仁济医院      | 鲍春德 | 150 | 2016.12.1-2019.6.30 |
| 28 | 16CR1028B | 初治菌阳肺结核缩短疗程新方案的临床研究                               | 肺科医院      | 沙巍  | 150 | 2016.12.1-2019.6.30 |
| 29 | 16CR1029B | 脑脊液CXCL13蛋白检测联合高灵敏度梅毒螺旋体核酸分析在梅毒治疗方案选择中的临床研究       | 市皮肤病医院    | 周平玉 | 150 | 2016.12.1-2019.6.30 |
| 30 | 16CR1030B | 采用随机对照试验进行颌面部创伤畸形精准医疗的有效性评估                       | 第九人民医院    | 沈国芳 | 150 | 2016.12.1-2019.6.30 |
| 31 | 16CR1031B | 针药复合麻醉技术在肺切除术围术期快速康复中的临床应用及研                      | 曙光医院      | 周嘉  | 150 | 2016.12.1-2019.6.30 |
| 32 | 16CR1032B | 重复经颅磁刺激增效治疗首发精神分裂症的多中心随机双盲对照临床研究                  | 同济医院      | 陆峥  | 150 | 2016.12.1-2019.6.30 |
| 33 | 16CR1033B | 单、双份脐血移植治疗恶性血液病临床疗效以及造血和免疫重建规律——前瞻性、多中心、开放、随机对照研究 | 新华医院      | 郝思国 | 150 | 2016.12.1-2019.6.30 |
| 34 | 16CR1034B | 老年急性髓系白血病个体化治疗方案                                  | 瑞金医院      | 李军民 | 150 | 2016.12.1-2019.6.30 |
| 35 | 16CR1035B | 机器人辅助下胸、腹腔镜与传统胸、腹腔镜微创治疗食管鳞癌的前瞻性、多中心、开放、随机对        | 胸科医院      | 李志刚 | 150 | 2016.12.1-2019.6.30 |
| 36 | 16CR1036B | 益气养阴解毒方联合吉非替尼治疗19Del与21L858R突变的晚期肺腺癌临床研究          | 岳阳中西医结合医院 | 许玲  | 150 | 2016.12.1-2019.6.30 |

|    |           |                                                           |         |     |     |                     |
|----|-----------|-----------------------------------------------------------|---------|-----|-----|---------------------|
| 37 | 16CR1037B | 多学科综合治疗下乳腺癌患者心脏安全全程管理方案的III期随机对照多中心研究                     | 瑞金医院    | 陈佳艺 | 150 | 2016.12.1-2019.6.30 |
| 38 | 16CR1038B | 非坏死性髋关节疼痛早期诊疗的多中心研究                                       | 市第六人民医院 | 张长青 | 150 | 2016.12.1-2019.6.30 |
| 39 | 16CR2001A | 基于精准医学的筛选靶向药物联合治疗在晚期卵巢癌中的临床研究                             | 仁济医院    | 狄文  | 80  | 2016.12.1-2019.6.30 |
| 40 | 16CR2002A | 基于基因组学的药物筛选模式在胆道恶性肿瘤治疗的前瞻性、随机对照临床研究                       | 仁济医院    | 王坚  | 80  | 2016.12.1-2019.6.30 |
| 41 | 16CR2003A | 尿液DNA甲基化检测诊断膀胱癌的临床试验研究                                    | 市第一人民医院 | 王翔  | 80  | 2016.12.1-2019.6.30 |
| 42 | 16CR2004A | 局部晚期口腔鳞癌 TPF诱导化疗的多中心前瞻性临床研究                               | 第九人民医院  | 张陈平 | 80  | 2016.12.1-2019.6.30 |
| 43 | 16CR2005A | 联合手术治疗中重度肥胖合并重度阻塞性睡眠呼吸暂停低(OOSA)疗效的随机对照临床试验                | 第九人民医院  | 王兵  | 80  | 2016.12.1-2019.6.30 |
| 44 | 16CR2006A | 精准筛查技术引导下光动力疗法治疗口腔白斑的评价者盲、随机对照研究                          | 第九人民医院  | 唐国瑶 | 80  | 2016.12.1-2019.6.30 |
| 45 | 16CR2007A | 基于蛋白组学和数据挖掘的非小细胞肺癌骨转移综合治疗模式的                              | 市第六人民医院 | 赵晖  | 80  | 2016.12.1-2019.6.30 |
| 46 | 16CR2008A | 基于遗传网络解析的肝移植术后他克莫司代谢差异多位点预测模型建立及应用研究                      | 市第一人民医院 | 彭志海 | 80  | 2016.12.1-2019.6.30 |
| 47 | 16CR2009A | 多中心、随机、双盲临床研究评价双环醇片治疗急性药物性肝损伤的有效性和安全性,并筛查影响预后的生物标记物       | 仁济医院    | 茅益民 | 80  | 2016.12.1-2019.6.30 |
| 48 | 16CR2010A | 半面短小早期下颌骨骨牵引术治疗的多中心前瞻性队列研究                                | 第九人民医院  | 柴岗  | 80  | 2016.12.1-2019.6.30 |
| 49 | 16CR2011A | 基于新型质谱芯片材料的早期肺癌体液代谢组学分析及临床诊断                              | 胸科医院    | 娄加陶 | 80  | 2016.12.1-2019.6.30 |
| 50 | 16CR2012A | 基于CTC基因分型技术指导上皮性卵巢癌精准诊疗的前瞻性、随机对照临床研究                      | 仁济医院    | 王育  | 80  | 2016.12.1-2019.6.30 |
| 51 | 16CR2013A | 基于影像和基因谱学指导肺小结节诊断及手术治疗方式研究                                | 胸科医院    | 赵珩  | 80  | 2016.12.1-2019.6.30 |
| 52 | 16CR2014A | 螺旋断层调强放射治疗技术(Tomotherapy HD)联合药物分子靶标检测下的化疗在儿童髓母细胞瘤中的研究与应用 | 新华医院    | 蒋马伟 | 80  | 2016.12.1-2019.6.30 |
| 53 | 16CR2015A | 精神病临床高危综合征的早期精准无创干预技术                                     | 市精神卫生中心 | 王继军 | 80  | 2016.12.1-2019.6.30 |
| 54 | 16CR2016A | 基于临床与基因组学大数据的I期非小细胞肺癌的精准医学研究                              | 肺科医院    | 姜格宁 | 80  | 2016.12.1-2019.6.30 |
| 55 | 16CR2017A | 难治性弥漫大B细胞淋巴瘤的分子标志物研究                                      | 瑞金医院    | 赵维莅 | 80  | 2016.12.1-2019.6.30 |
| 56 | 16CR2018A | 前列腺增生手术前膀胱功能标准制定前瞻性、多中心临床研究                               | 市第一人民医院 | 夏术阶 | 80  | 2016.12.1-2019.6.30 |

|    |           |                                                                        |           |     |    |                     |
|----|-----------|------------------------------------------------------------------------|-----------|-----|----|---------------------|
| 57 | 16CR2019A | 螺内酯对肥厚型心肌病治疗作用的多中心随机对照研究                                               | 新华医院      | 李毅刚 | 80 | 2016.12.1-2019.6.30 |
| 58 | 16CR2020A | <sup>18</sup> F-FDG联合 <sup>11</sup> C-β-CFT PET/CT显像早期鉴别诊断原发性帕金森病的临床研究 | 仁济医院      | 刘建军 | 80 | 2016.12.1-2019.6.30 |
| 59 | 16CR2021A | 时间-空间关联成像技术在胎儿复杂先天性心脏病诊断中的应用价值                                         | 新华医院      | 陈笋  | 80 | 2016.12.1-2019.6.30 |
| 60 | 16CR2022A | 腹腔镜下保留幽门及迷走神经对早期胃癌患者术后生活质量影响的随机对照研究                                    | 仁济医院      | 赵刚  | 80 | 2016.12.1-2019.6.30 |
| 61 | 16CR2023A | 中高危老年MDS/sAML低毒高效联合化疗方案的临床研究                                           | 华东医院      | 谢彦晖 | 80 | 2016.12.1-2019.6.30 |
| 62 | 16CR2024A | 基于超深度测序技术的儿童白血病MRD精准检测研究                                               | 上海儿童医学中心  | 李本尚 | 80 | 2016.12.1-2019.6.30 |
| 63 | 16CR2025B | 布美他尼用于儿童孤独症谱系障碍的药物干预疗效的随机双盲对照试验                                        | 新华医院      | 李斐  | 60 | 2016.12.1-2019.6.30 |
| 64 | 16CR2026B | 灸药结合防治乳腺癌化疗性骨髓抑制的临床研究                                                  | 岳阳中西医结合医院 | 薛晓红 | 60 | 2016.12.1-2019.6.30 |
| 65 | 16CR2027B | 首发抑郁症患者复发预测模型研究：基于临床特征和免疫组学的大数据分析                                      | 市精神卫生中心   | 陈俊  | 60 | 2016.12.1-2019.6.30 |
| 66 | 16CR2028B | 中西医结合分期辨证治疗三阴性乳腺癌的临床研究                                                 | 龙华医院      | 秦悦农 | 60 | 2016.12.1-2019.6.30 |
| 67 | 16CR2029B | 下咽鳞癌新辅助前瞻性单中心精准化治疗及生命组学研究                                              | 市第一人民医院   | 董频  | 60 | 2016.12.1-2019.6.30 |
| 68 | 16CR2030B | 基于第二代循环肿瘤细胞分子筛-基因分型检测技术的前列腺癌进展风险预测模型在精准诊治中的临床研究                        | 新华医院      | 齐隽  | 60 | 2016.12.1-2019.6.30 |
| 69 | 16CR2031B | 儿童弥漫型内生性桥脑胶质瘤(DIPG)精准治疗方案的疗效评价                                         | 新华医院      | 马杰  | 60 | 2016.12.1-2019.6.30 |
| 70 | 16CR2032B | 甲状腺肿瘤联合诊疗及分子标志物检测在甲状腺癌治疗及预后判断中的临床研究                                    | 市第十人民医院   | 邢明照 | 60 | 2016.12.1-2019.6.30 |
| 71 | 16CR2033B | 中药干预难治性膜性肾病的个性化研究                                                      | 龙华医院      | 邓跃毅 | 60 | 2016.12.1-2019.6.30 |
| 72 | 16CR2034B | 醛固酮拮抗剂延缓高血压伴心肌肥厚患者舒张功能减退的随机对照研究                                        | 第九人民医院    | 王长谦 | 60 | 2016.12.1-2019.6.30 |
| 73 | 16CR2035B | 银屑病“凉血潜阳法”临床方案优化及再评价研究                                                 | 岳阳中西医结合医院 | 李斌  | 60 | 2016.12.1-2019.6.30 |
| 74 | 16CR2036B | 基于力敏感分子的先天性髋关节发育不良生物标志物筛选及早期防治策略研究                                     | 新华医院      | 陈晓东 | 60 | 2016.12.1-2019.6.30 |
| 75 | 16CR2037B | 粪便菌群移植在炎症性肠病患者中的应用及供体菌群多样性对疗效的影响                                       | 仁济医院      | 冉志华 | 60 | 2016.12.1-2019.6.30 |
| 76 | 16CR2038B | 0-1期放射线颌骨坏死临床治疗前瞻性随机对照研究                                               | 第九人民医院    | 何悦  | 60 | 2016.12.1-2019.6.30 |

|    |           |                                        |           |     |    |                     |
|----|-----------|----------------------------------------|-----------|-----|----|---------------------|
| 77 | 16CR2039B | 基于磷酸化蛋白质组学研究对曲妥珠单抗高反应性的复发难治性胃腺癌分子特征    | 市第一人民医院   | 傅国辉 | 60 | 2016.12.1-2019.6.30 |
| 78 | 16CR2040B | 地西他滨结合中药个体化治疗骨髓增生异常综合征随机对照多中心临床研究      | 市中医医院     | 陆嘉惠 | 60 | 2016.12.1-2019.6.30 |
| 79 | 16CR2041B | 树突状细胞干预化疗失败结核病的研究                      | 市公共卫生临床中心 | 卢水华 | 60 | 2016.12.1-2019.6.30 |
| 80 | 16CR2042B | 基于计算机人工智能识别系统建立及超声支气管镜组织活检和引导定位精准诊断肺结节 | 新华医院      | 郭雪君 | 60 | 2016.12.1-2019.6.30 |
| 81 | 16CR2043B | 原发中枢神经系统淋巴瘤的分子预后模型建立及个体化精准治疗           | 华山北院      | 陈波斌 | 60 | 2016.12.1-2019.6.30 |
| 82 | 16CR2044B | 儿童睡眠呼吸障碍伴错颌畸形多中心多学科协同诊治流程及疗效评价体系的建立    | 市口腔病防治院   | 刘月华 | 60 | 2016.12.1-2019.6.30 |
| 83 | 16CR2045B | 基于临床、立体形态及血流动力学四维评价指导小型脑动脉瘤的精准干预策略     | 仁济医院      | 万杰清 | 60 | 2016.12.1-2019.6.30 |
| 84 | 16CR2046B | 颅内大动脉狭窄所致青年人卒中的精准诊治研究                  | 市第一人民医院   | 王乔树 | 60 | 2016.12.1-2019.6.30 |
| 85 | 16CR2047B | 解毒通络生津方治疗原发性干燥综合征的分层随机双盲平行对照临床研究       | 岳阳中西医结合医院 | 薛鸾  | 60 | 2016.12.1-2019.6.30 |
| 86 | 16CR2048B | 多模态数字化脑血流储备的评估对缺血性脑卒中临床治疗的指导           | 仁济医院      | 张晓华 | 60 | 2016.12.1-2019.6.30 |
| 87 | 16CR3001A | 血清DKK4检测用于胃肠道间质瘤早期诊断和复发监测的应用研究         | 仁济医院      | 曹 晖 | 50 | 2016.12.1-2019.6.30 |
| 88 | 16CR3002A | 影像学表现特征为肺部磨玻璃样病变的早期肺腺癌临床诊断技术研发及应用研究    | 仁济医院      | 赵晓菁 | 50 | 2016.12.1-2019.6.30 |
| 89 | 16CR3003A | 植入前遗传学筛查新技术对改善严重男性不育患者辅助生殖结局与出生缺陷的疗效评估 | 国际和平妇幼保健院 | 黄荷凤 | 50 | 2016.12.1-2019.6.30 |
| 90 | 16CR3004A | 单肢区域麻醉及镇痛新技术在老年髋关节置换术中的临床研究及推广应用       | 同济医院      | 余 斌 | 50 | 2016.12.1-2019.6.30 |
| 91 | 16CR3005A | 希氏束起搏临床应用中的安全性与有效性评价                   | 胸科医院      | 李若谷 | 50 | 2016.12.1-2019.6.30 |
| 92 | 16CR3006A | microRNA在围术期急性冠脉综合征中的早期诊断的多中心临床试       | 新华医院      | 何 斌 | 50 | 2016.12.1-2019.6.30 |
| 93 | 16CR3007A | 导航支气管镜引导的消融技术治疗早期周围型肺癌临床研究             | 胸科医院      | 孙加源 | 50 | 2016.12.1-2019.6.30 |
| 94 | 16CR3008A | 新建的“瑞金急淋方案”治疗初发急性淋巴细胞白血病的疗效评估和预后判断     | 瑞金医院      | 糜坚青 | 50 | 2016.12.1-2019.6.30 |
| 95 | 16CR3009A | 基于SPECT显像判定颈部肌张力障碍患者痉挛责任肌肉的新技术研        | 同济医院      | 靳令经 | 50 | 2016.12.1-2019.6.30 |
| 96 | 16CR3010A | 自适应多功能射频消融系统在骨与软组织肿瘤中的研发与应用            | 市第一人民医院   | 蔡郑东 | 50 | 2016.12.1-2019.6.30 |

|     |           |                                      |         |     |    |                     |
|-----|-----------|--------------------------------------|---------|-----|----|---------------------|
| 97  | 16CR3011A | 颅脑伤昏迷早期右正中神经刺激促醒技术的设备研发、疗效验证及临床推广    | 仁济医院    | 高国一 | 50 | 2016.12.1-2019.6.30 |
| 98  | 16CR3012A | 痛风规范化诊疗的转化与推广                        | 华山北院    | 邹和建 | 50 | 2016.12.1-2019.6.30 |
| 99  | 16CR3013A | 肌腱再生支架材料在肌腱修复中的应用                    | 第九人民医院  | 刘伟  | 50 | 2016.12.1-2019.6.30 |
| 100 | 16CR3014A | 后置式应力型青光眼引流阀用于治疗新生血管性青光眼的安全性和有效性临床研究 | 同济医院    | 荣翱  | 50 | 2016.12.1-2019.6.30 |
| 101 | 16CR3015A | 基于虚拟现实技术的合成毒品成瘾诊断评估系统的研发与应用          | 市精神卫生中心 | 赵敏  | 50 | 2016.12.1-2019.6.30 |
| 102 | 16CR3016A | 中国心理健康求助者精神病发病危险度预算器                 | 市精神卫生中心 | 张天宏 | 50 | 2016.12.1-2019.6.30 |
| 103 | 16CR3017A | 骨科钻孔瞄准器的改进及其导向的椎弓根螺钉置入的随机对照研究        | 市第十人民医院 | 贺石生 | 50 | 2016.12.1-2019.6.30 |
| 104 | 16CR3018A | 利用3D打印技术制作肺部小结节术前辅助定位装置              | 肺科医院    | 陈昶  | 50 | 2016.12.1-2019.6.30 |
| 105 | 16CR3019A | 个性化正颌外科内固定系统的优化设计及精确性临床试验            | 第九人民医院  | 王旭东 | 50 | 2016.12.1-2019.6.30 |
| 106 | 16CR3020A | 心脏磁共振“整合新序列”检测流程精准预测不同原因心肌病致心衰的风险    | 仁济医院    | 姜萌  | 50 | 2016.12.1-2019.6.30 |
| 107 | 16CR3021A | 抑囊方治疗多囊肾CKD3-4期的临床研究                 | 曙光医院    | 高建东 | 50 | 2016.12.1-2019.6.30 |
| 108 | 16CR3022A | 生物制剂治疗难治性肾病临床方案随机对照研究                | 仁济医院    | 王玲  | 50 | 2016.12.1-2019.6.30 |
| 109 | 16CR3023A | 早期肺癌术中冰冻切片病理诊断标准的建立与评估               | 胸科医院    | 张杰  | 50 | 2016.12.1-2019.6.30 |
| 110 | 16CR3024A | 移动式手术路径影像引导系统研发及临床应用                 | 仁济医院    | 许建荣 | 50 | 2016.12.1-2019.6.30 |
| 111 | 16CR3025A | 新型可降解镁合金螺钉治疗单纯内踝骨折的临床观察研究            | 第九人民医院  | 郝永强 | 50 | 2016.12.1-2019.6.30 |
| 112 | 16CR3026A | 血管腔内微波辐射器治疗下肢静脉曲张规范化研究               | 市中医医院   | 王小平 | 50 | 2016.12.1-2019.6.30 |
| 113 | 16CR3027A | 新型可舒缩泪道支架的研发                         | 同济医院    | 毕燕龙 | 50 | 2016.12.1-2019.6.30 |
| 114 | 16CR3028A | Mini PDX药敏试验在胆道恶性肿瘤个体化治疗中的前瞻性应用研究    | 仁济医院    | 陈炜  | 50 | 2016.12.1-2019.6.30 |
| 115 | 16CR3029A | 系统化肘关节功能障碍治疗体系的建立                    | 市六东院    | 范存义 | 50 | 2016.12.1-2019.6.30 |
| 116 | 16CR3030A | 3D打印解剖适配型椎间融合器的临床应用研究                | 第九人民医院  | 赵杰  | 50 | 2016.12.1-2019.6.30 |
| 117 | 16CR3031A | 4D-CTA联合血流动力学预测脑动脉瘤破裂的新方法            | 仁济医院    | 赵兵  | 50 | 2016.12.1-2019.6.30 |
| 118 | 16CR3032A | 新型电子交替遮盖眼镜对青少年屈光参差性弱视的远期疗效及个性化方案研究临床 | 市眼病防治中心 | 柯碧莲 | 50 | 2016.12.1-2019.6.30 |
| 119 | 16CR3033A | 新型牙种植体系统临床初步应用研究                     | 第九人民医院  | 赖红昌 | 50 | 2016.12.1-2019.6.30 |
| 120 | 16CR3034A | 基于三维定量心肌微循环功能的血流储备评估新技术的建立与应用        | 仁济医院    | 卜军  | 50 | 2016.12.1-2019.6.30 |

|     |           |                                           |           |     |    |                     |
|-----|-----------|-------------------------------------------|-----------|-----|----|---------------------|
| 121 | 16CR3035A | 血流储备评估与虚拟支架置入技术指导冠状动脉病变治疗策略               | 胸科医院      | 曲新凯 | 50 | 2016.12.1-2019.6.30 |
| 122 | 16CR3036A | 定期支气管镜下气道廓清及灌洗技术在重度支气管扩张症中的应用             | 肺科医院      | 徐金富 | 50 | 2016.12.1-2019.6.30 |
| 123 | 16CR3037A | 基因分型循环肿瘤细胞检测技术预测胃癌术后复发风险与评估疗效的临床研究        | 新华医院      | 陆巍  | 50 | 2016.12.1-2019.6.30 |
| 124 | 16CR3038A | 个体化外周血循环肿瘤细胞联合肿瘤标记物检测对晚期结肠癌患者化疗疗效的评估      | 市第一人民医院   | 李琦  | 50 | 2016.12.1-2019.6.30 |
| 125 | 16CR3039A | 靶向刀冷冻消融联合中药治疗肝癌的临床研究                      | 龙华医院      | 武清  | 50 | 2016.12.1-2019.6.30 |
| 126 | 16CR3040A | 补肾活血方治疗卵巢早衰的应用研究                          | 岳阳中西医结合医院 | 董莉  | 50 | 2016.12.1-2019.6.30 |
| 127 | 16CR3041A | 低频重复经颅磁刺激治疗慢性耳鸣                           | 市第六人民医院   | 时海波 | 50 | 2016.12.1-2019.6.30 |
| 128 | 16CR3042A | 普通锁定钢板与新型锁定钢板治疗肱骨近端骨折的前瞻性对照研究             | 市第六人民医院   | 陈云丰 | 50 | 2016.12.1-2019.6.30 |
| 129 | 16CR3043A | 覆膜支架新技术治疗颅内复杂动脉瘤的临床应用研究                   | 市第六人民医院   | 朱悦琦 | 50 | 2016.12.1-2019.6.30 |
| 130 | 16CR3044A | 新型全覆膜金属支架治疗难治性良性气道狭窄的临床疗效及安全性研究           | 市第一人民医院   | 李强  | 50 | 2016.12.1-2019.6.30 |
| 131 | 16CR3045A | 国产化标准型人工颞下颌关节的临床研究                        | 第九人民医院    | 何冬梅 | 50 | 2016.12.1-2019.6.30 |
| 132 | 16CR3046A | 正畸个性化托槽三维打印系统的研发及临床研究                     | 第九人民医院    | 房兵  | 50 | 2016.12.1-2019.6.30 |
| 133 | 16CR3047A | 精准选择性区域淋巴结廓清技术在新辅助化疗联合肝移植治疗乙肝相关性肝内胆管癌中的应用 | 仁济医院      | 顾劲扬 | 50 | 2016.12.1-2019.6.30 |
| 134 | 16CR3048A | 联合CAD、FEM及3D打印技术在临床颅骨修补中的应用               | 市第十人民医院   | 陈先震 | 50 | 2016.12.1-2019.6.30 |
| 135 | 16CR3049A | 全雄阻断联合化疗新辅助治疗高危或局部进展性前列腺癌的疗效及预测预后因素分析     | 仁济医院      | 薛蔚  | 50 | 2016.12.1-2019.6.30 |
| 136 | 16CR3050A | 咬肌-跨面双重神经支配重建早期面瘫治疗体系的研究和建立               | 第九人民医院    | 王炜  | 50 | 2016.12.1-2019.6.30 |
| 137 | 16CR3051A | 3D打印鼻骨复位器在鼻骨复位术中的临床研究                     | 第九人民医院    | 王珮华 | 50 | 2016.12.1-2019.6.30 |
| 138 | 16CR3052A | 99mTc标记PD-L1抗体片段在非小细胞肺癌诊断中的临床研究           | 市第一人民医院   | 赵晋华 | 50 | 2016.12.1-2019.6.30 |
| 139 | 16CR3053A | 循环肿瘤细胞的单细胞检测在肺癌免疫疗法中的应用                   | 胸科医院      | 陆舜  | 50 | 2016.12.1-2019.6.30 |
| 140 | 16CR3054A | 吡非尼酮治疗具有自身免疫特征间质性肺炎的疗效和安全探索研究             | 肺科医院      | 李惠萍 | 50 | 2016.12.1-2019.6.30 |
| 141 | 16CR3055A | 等长抗阻肌力训练防治老年人肌少症的应用推广研究                   | 华东医院      | 保志军 | 50 | 2016.12.1-2019.6.30 |
| 142 | 16CR3056A | 基于互联网的肺癌立体定向放射治疗技术的推广和管理                  | 胸科医院      | 徐志勇 | 50 | 2016.12.1-2019.6.30 |

|     |           |                                           |           |     |    |                         |
|-----|-----------|-------------------------------------------|-----------|-----|----|-------------------------|
| 143 | 16CR3057A | 蛋白 / microRNA液相生物芯片多元检测平台的构建及其在肺癌早期诊断中的应用 | 新华医院      | 沈立松 | 50 | 2016. 12. 1-2019. 6. 30 |
| 144 | 16CR3058A | 基于微流控技术快速富集结核杆菌方法的建立和临床应用                 | 瑞金北院      | 顾志东 | 50 | 2016. 12. 1-2019. 6. 30 |
| 145 | 16CR3059A | 先天性小耳畸形功能重建和美学再造的研究                       | 第九人民医院    | 张如鸿 | 50 | 2016. 12. 1-2019. 6. 30 |
| 146 | 16CR3060B | 牙种植牵引器 (DID) 关键技术研究与临床试验研究                | 第九人民医院    | 徐立群 | 30 | 2016. 12. 1-2019. 6. 30 |
| 147 | 16CR3061B | 甲状腺结节人工智能多模态超声诊断系统的开发及应用                  | 市第十人民医院   | 徐辉雄 | 30 | 2016. 12. 1-2019. 6. 30 |
| 148 | 16CR3062B | 微波消融在肾囊性疾病治疗中的临床应用研究                      | 仁济医院      | 陈勇辉 | 30 | 2016. 12. 1-2019. 6. 30 |
| 149 | 16CR3063B | 混合现实引导椎管内穿刺技术的研发和应用                       | 华东医院      | 顾卫东 | 30 | 2016. 12. 1-2019. 6. 30 |
| 150 | 16CR3064B | 减孔腹腔镜和单孔腹腔镜技术在结直肠恶性肿瘤中的临床研究               | 瑞金北院      | 赵 任 | 30 | 2016. 12. 1-2019. 6. 30 |
| 151 | 16CR3065B | 铂类药物应用于乳腺癌新辅助及辅助治疗的多中心系列临床研究              | 仁济医院      | 陆劲松 | 30 | 2016. 12. 1-2019. 6. 30 |
| 152 | 16CR3066B | 组织工程化气管临床实验研究                             | 胸科医院      | 谭 强 | 30 | 2016. 12. 1-2019. 6. 30 |
| 153 | 16CR3067B | 下尿路肿瘤术后男性勃起功能康复的临床研究                      | 仁济医院      | 卢慕峻 | 30 | 2016. 12. 1-2019. 6. 30 |
| 154 | 16CR3068B | 双球囊药物灌注联合斑块旋切腔内介入治疗股腘动脉闭塞的可行性研究           | 仁济医院      | 张 岚 | 30 | 2016. 12. 1-2019. 6. 30 |
| 155 | 16CR3069B | 一种新设备: 胚胎移植保温管对胚胎移植妊娠结局影响的随机对照研究          | 市第一妇婴保健院  | 李昆明 | 30 | 2016. 12. 1-2019. 6. 30 |
| 156 | 16CR3070B | 儿童脂肪瘤型脊髓栓系综合征的早期规范化治疗                     | 市儿童医院     | 陈若平 | 30 | 2016. 12. 1-2019. 6. 30 |
| 157 | 16CR3071B | 微流控分选技术在晚期肺癌精准化疗中的应用                      | 胸科医院      | 陈智伟 | 30 | 2016. 12. 1-2019. 6. 30 |
| 158 | 16CR3072B | Mini-PDX模型药敏检测指导恶性腹水化疗个体化研究               | 市第十人民医院   | 许 青 | 30 | 2016. 12. 1-2019. 6. 30 |
| 159 | 16CR3073B | 基于病理组织学改变的霍苏养胃口服液治疗萎缩性胃炎的远期疗效观察           | 岳阳中西医结合医院 | 王晓素 | 30 | 2016. 12. 1-2019. 6. 30 |
| 160 | 16CR3074B | 健腰密骨颗粒治疗骨量减少性腰痛的多中心临床研究                   | 龙华医院      | 叶 洁 | 30 | 2016. 12. 1-2019. 6. 30 |
| 161 | 16CR3075B | 水黾贴联合托伐普坦片治疗肝硬化顽固性腹水的临床研究                 | 市中医医院     | 祝峻峰 | 30 | 2016. 12. 1-2019. 6. 30 |
| 162 | 16CR3076B | 新型耳戴式感应器筛查糖尿病周围神经病变                       | 第九人民医院    | 陆颖理 | 30 | 2016. 12. 1-2019. 6. 30 |
| 163 | 16CR3077B | TaTME相关手术辅助器械的研发应用及安全性有效性研究               | 瑞金医院      | 胡伟国 | 30 | 2016. 12. 1-2019. 6. 30 |
| 164 | 16CR3078B | 一种新型的折叠补片一体化成形环设计                         | 上海儿童医学中心  | 殷 猛 | 30 | 2016. 12. 1-2019. 6. 30 |
| 165 | 16CR3079B | 基于云端大数据的小儿先心病智能专家辅助筛查系统研发和优化              | 新华医院      | 赵鹏军 | 30 | 2016. 12. 1-2019. 6. 30 |

|     |           |                                            |          |     |    |                     |
|-----|-----------|--------------------------------------------|----------|-----|----|---------------------|
| 166 | 16CR3080B | Heartech左心室隔离系统治疗左心功能不全前瞻性随机对照临床成果转化研究-    | 瑞金医院     | 张瑞岩 | 30 | 2016.12.1-2019.6.30 |
| 167 | 16CR3081B | 基于低频电刺激神经传导技术的电子孕妇止吐仪研发和转化项目               | 市第一妇婴保健院 | 路鹤晴 | 30 | 2016.12.1-2019.6.30 |
| 168 | 16CR3082B | 基于震荡混合技术、液滴阵列技术的结肠癌细胞培养与药敏反应芯片研发           | 市第一人民医院  | 周崇治 | 30 | 2016.12.1-2019.6.30 |
| 169 | 16CR3083B | 单丝聚酯疝补片应用于腹股沟疝修补术的临床研究                     | 胸科医院     | 周海燕 | 30 | 2016.12.1-2019.6.30 |
| 170 | 16CR3084B | 合并恶性肿瘤或致死性肺间质病变皮炎的早期精确诊断                   | 瑞金医院     | 曹 华 | 30 | 2016.12.1-2019.6.30 |
| 171 | 16CR3085B | 脓毒症快速诊断细胞因子试剂盒的开发研究                        | 上海儿童医学中心 | 宁铂涛 | 30 | 2016.12.1-2019.6.30 |
| 172 | 16CR3086B | 急性Stanford A型主动脉夹层弓部杂交处理                   | 仁济医院     | 薛 松 | 30 | 2016.12.1-2019.6.30 |
| 173 | 16CR3087B | 一站式微创外科/导管杂交消融技术治疗持续性房颤的临床研究               | 新华医院     | 梅 举 | 30 | 2016.12.1-2019.6.30 |
| 174 | 16CR3088B | 3D打印定制式骨关节康复矫形辅具的临床转化研究                    | 第九人民医院   | 王金武 | 30 | 2016.12.1-2019.6.30 |
| 175 | 16CR3089B | 体内显微技术在子宫颈癌诊断中的应用                          | 市第一妇婴保健院 | 李 芳 | 30 | 2016.12.1-2019.6.30 |
| 176 | 16CR3090B | 早期单椎板切开选择性神经后根离断术联合康复治疗对儿童痉挛性脑性瘫痪临床疗效的研究   | 市儿童医院    | 肖 波 | 30 | 2016.12.1-2019.6.30 |
| 177 | 16CR3091B | 磁共振引导聚焦超声(MRgFUS)前列腺癌消融术和MRI消融评价研究         | 市第一人民医院  | 李康安 | 30 | 2016.12.1-2019.6.30 |
| 178 | 16CR3092B | 基于腔内标记TRUS-MRI实时三维图像融合前列腺穿刺导航系统的           | 新华医院     | 陈亚青 | 30 | 2016.12.1-2019.6.30 |
| 179 | 16CR3093B | 淋巴超声造影引导乳腺癌前哨淋巴结活检导丝定位                     | 市第一人民医院  | 杜联芳 | 30 | 2016.12.1-2019.6.30 |
| 180 | 16CR3094B | 药物洗脱球囊在冠心病患者中应用的临床疗效和安全性研究                 | 市第六人民医院  | 魏 盟 | 30 | 2016.12.1-2019.6.30 |
| 181 | 16CR3095B | 养阴活血生津方干预(阴虚津亏,热毒血瘀型)干燥综合征的作用及机制初探         | 市中医院     | 苏 晓 | 30 | 2016.12.1-2019.6.30 |
| 182 | 16CR3096B | 银屑病早期诊断及疗效评价非创方法的建立                        | 市皮肤病医院   | 邹 颖 | 30 | 2016.12.1-2019.6.30 |
| 183 | 16CR3097B | 重离子新技术治疗国人前列腺癌的临床规范及相关转化研究                 | 质子重离子医院  | 章 青 | 30 | 2016.12.1-2019.6.30 |
| 184 | 16CR3098B | 体外药敏分析指导急性髓系白血病个体化精准治疗的应用及效果               | 市第一人民医院  | 李 莉 | 30 | 2016.12.1-2019.6.30 |
| 185 | 16CR3099B | 应用新型干细胞过滤富集器快速制备活性生物材料植骨与自体骨移植进行骨修复的随机、对照临 | 第九人民医院   | 干耀恺 | 30 | 2016.12.1-2019.6.30 |
| 186 | 16CR3100B | 一种新的微型骨骺阻滞钢板对儿童膝关节成角畸形矫正的临床研               | 新华医院     | 李 海 | 30 | 2016.12.1-2019.6.30 |
| 187 | 16CR3101B | 神经补片应用于微血管减压术的临床研究                         | 胸科医院     | 殷 青 | 30 | 2016.12.1-2019.6.30 |
| 188 | 16CR3102B | 新型穿刺用定位装置应用于肺部肿瘤病理诊断精准化肺穿刺指导               | 胸科医院     | 徐云华 | 30 | 2016.12.1-2019.6.30 |

|     |           |                                                              |           |     |    |                      |
|-----|-----------|--------------------------------------------------------------|-----------|-----|----|----------------------|
| 189 | 16CR3103B | 基于鼾声分析技术的OSAHS诊断系统的开发                                        | 市第六人民医院   | 易红良 | 30 | 2016.12.1-2019.6.30  |
| 190 | 16CR3104B | 颅颌关节联合假体的研发和临床初步应用                                           | 第九人民医院    | 张善勇 | 30 | 2016.12.1-2019.6.30  |
| 191 | 16CR3105B | SWERT评价脑梗死患者心脑血管耦联及APP终端预警系统构建                               | 市第一人民医院   | 李朝军 | 30 | 2016.12.1-2019.6.30  |
| 192 | 16CR3106B | MSCs-HNF4 $\alpha$ 外泌体联合常温下机械灌注在脂肪肝移植中的作用                    | 仁济医院      | 杭化莲 | 30 | 2016.12.1-2019.6.30  |
| 193 | 16CR3107B | 腹腔镜微创技术在胰十二指肠切除术中的临床规范化应用与推广                                 | 华东医院      | 王 巍 | 30 | 2016.12.1-2019.6.30  |
| 194 | 16CR3108B | ACL双束重建与双束重建同时ALL重建的对比研究                                     | 市第六人民医院   | 赵金忠 | 30 | 2016.12.1-2019.6.30  |
| 195 | 16CR3109B | 血流动力学多模态参数联合弹性成像在婴幼儿肝移植中的应用                                  | 仁济医院      | 顾莉红 | 30 | 2016.12.1-2019.6.30  |
| 196 | 16CR3110B | PET/MR操作常规的建立及在头颈部、上腹部和盆腔肿瘤中的应用                              | 瑞金医院      | 李 彪 | 30 | 2016.12.1-2019.6.30  |
| 197 | 16CR3111B | 便携式数码电子阴道镜（SZB I系列）辅助诊断生殖道疾病的有效性和安全性研究                       | 市皮肤病医院    | 顾 昕 | 30 | 2016.12.1-2019.6.30  |
| 198 | 16CR3112B | Intrabeam 放射治疗新技术临床转化研究                                      | 市第六人民医院   | 付 杰 | 30 | 2016.12.1-2019.6.30  |
| 199 | 16CR3113B | 沙利度胺治疗难治性消化道出血的随机安慰剂对照研究                                     | 仁济医院      | 戈之铮 | 30 | 2016.12.1-2019.6.30  |
| 200 | 16CR3114B | <sup>99</sup> Tc-MDP和阿仑膦酸钠预防和治疗绝经后分化型甲状腺癌TSH抑制治疗骨质疏松的多中心临床研究 | 新华医院      | 马 超 | 30 | 2016.12.1-2019.6.30  |
| 201 | 16CR3115B | 一次性使用胸腔引流装置                                                  | 胸科医院      | 范利民 | 30 | 2016.12.1-2019.6.30  |
| 202 | 16CR3116B | 基于人工神经网络及CT纹理分析肺部结节恶性风险评估软件的开发与推广                            | 肺科医院      | 谢 冬 | 30 | 2016.12.1-2019.6.30  |
| 203 | 16CR3117B | 基于生物应力生长原理的长段缺失型食管闭锁个体化诊疗方案                                  | 新华医院      | 王俊  | 30 | 2016.12.1-2019.6.30  |
| 204 | 16CR3118B | 脐血间充质干细胞静脉注射治疗重症遗传性皮肤病的临床研究                                  | 新华医院      | 姚志荣 | 30 | 2016.12.1-2019.6.30  |
| 205 | 16CR3119B | 先天性小耳畸形听力与形态一期重建术                                            | 第九人民医院    | 石润杰 | 30 | 2016.12.1-2019.6.30  |
| 206 | 16CR4001A | 电针治疗女性压力性尿失禁适宜技术研发与推广应用研究                                    | 岳阳中西医结合医院 | 陈跃来 | 15 | 2016.12.1-2018.11.30 |
| 207 | 16CR4002A | 儿童哮喘分级诊疗中基于智能设备监测的家庭雾化治疗依从性研究                                | 上海儿童医学中心  | 殷勇  | 15 | 2016.12.1-2018.11.30 |
| 208 | 16CR4003A | COPD肺康复体能训练方案研究与应用                                           | 华东医院      | 朱惠莉 | 15 | 2016.12.1-2018.11.30 |
| 209 | 16CR4004A | 清肠栓治疗轻中度溃疡性直肠炎（活动期）的临床评价与推广研究                                | 龙华医院      | 林江  | 15 | 2016.12.1-2018.11.30 |
| 210 | 16CR4005A | 基于简易窄带成像分型的早期胃癌临床诊断模型的研究与推广                                  | 仁济医院      | 李晓波 | 15 | 2016.12.1-2018.11.30 |
| 211 | 16CR4006A | 超细经皮肾镜取石术的临床推广                                               | 仁济医院      | 陈奇  | 15 | 2016.12.1-2018.11.30 |
| 212 | 16CR4007A | 慢性延迟开放型咽鼓管功能障碍的规范化诊断和治疗                                      | 新华医院      | 杨军  | 15 | 2016.12.1-2018.11.30 |

|     |           |                                                 |           |     |    |                      |
|-----|-----------|-------------------------------------------------|-----------|-----|----|----------------------|
| 213 | 16CR4008A | 药物诱导睡眠内镜对儿童OSAHS上气道阻塞平面精准定位的多中心临床研究             | 上海儿童医学中心  | 陈洁  | 15 | 2016.12.1-2018.11.30 |
| 214 | 16CR4009A | 中药多途径给药联合恩替卡韦抗病毒治疗早中期HBV相关性慢加急性肝衰竭的多中心随机对照研究    | 市公共卫生临床中心 | 陈晓蓉 | 15 | 2016.12.1-2018.11.30 |
| 215 | 16CR4010A | 基于分级诊疗方案的腹腔镜腹股沟疝无张力修补术临床路径的建立与技术推广              | 第九人民医院    | 顾岩  | 15 | 2016.12.1-2018.11.30 |
| 216 | 16CR4011A | 颈椎病三级防治网络的运作及“整颈三步九法”的推广应用研究                    | 龙华医院      | 莫文  | 15 | 2016.12.1-2018.11.30 |
| 217 | 16CR4012A | 营养代餐联合个体化运动处方干预超重及肥胖的2型糖尿病的临床应用及初步推广            | 新华医院      | 苏青  | 15 | 2016.12.1-2018.11.30 |
| 218 | 16CR4013A | CTRP蛋白家族对糖代谢异常者血管功能的影响                          | 瑞金医院      | 梁伟  | 15 | 2016.12.1-2018.11.30 |
| 219 | 16CR4014A | ERAS理念联合单孔腹腔镜胆囊切除在日间手术中的运用                      | 仁济医院      | 王辉  | 15 | 2016.12.1-2018.11.30 |
| 220 | 16CR4015A | 创伤骨科护理技术的推广应用                                   | 市第六人民医院   | 胡三莲 | 15 | 2016.12.1-2018.11.30 |
| 221 | 16CR4016A | 基于移动平台的儿童营养风险早期筛查与综合防治技术应用                      | 市儿童医院     | 陈津津 | 15 | 2016.12.1-2018.11.30 |
| 222 | 16CR4017A | 广角数码视网膜图像采集系统引导下的新生儿眼疾多中心筛查的开展和推广               | 新华医院      | 赵培泉 | 15 | 2016.12.1-2018.11.30 |
| 223 | 16CR4018A | 儿童龋病分级管理                                        | 市口腔病防治院   | 张颖  | 15 | 2016.12.1-2018.11.30 |
| 224 | 16CR4019A | 联合胎儿心超及基因诊断对先天性心脏病进行产前筛查及诊断的技术推广                | 国际和平妇幼保健院 | 程蔚蔚 | 15 | 2016.12.1-2018.11.30 |
| 225 | 16CR4020A | 远程血糖监测联合互联网移动端(APP)的推广应用对提高社区2型糖尿病分层管理及血糖达标率的影响 | 瑞金北院      | 陈宇红 | 15 | 2016.12.1-2018.11.30 |
| 226 | 16CR4021A | 中医呼吸康复干预COPD稳定期的多中心临床评价与示范推广                    | 龙华医院      | 方泓  | 15 | 2016.12.1-2018.11.30 |
| 227 | 16CR4022A | 眩晕便捷诊断及鉴别诊断技术的推广应用                              | 市第六人民医院   | 王慧  | 15 | 2016.12.1-2018.11.30 |
| 228 | 16CR4023A | 隔药灸治疗溃疡性结肠炎临床推广计划                               | 岳阳中西医结合医院 | 吴焕淦 | 15 | 2016.12.1-2018.11.30 |
| 229 | 16CR4024A | 苓桂术甘汤干预非酒精性脂肪肝脾阳虚证的示范技术与应用推广                    | 龙华医院      | 郑培永 | 15 | 2016.12.1-2018.11.30 |
| 230 | 16CR4025A | 以糖尿病足综合防治为先导—建立糖尿病及慢性并发症三级全程综合管理模式的实践与探索        | 市第一人民医院   | 彭永德 | 15 | 2016.12.1-2018.11.30 |
| 231 | 16CR4026A | 单孔胸腔镜肺叶/亚肺叶切除术治疗早期非小细胞肺癌                        | 肺科医院      | 朱余明 | 15 | 2016.12.1-2018.11.30 |
| 232 | 16CR4027A | 纯音测听自动掩蔽技术的推广应用                                 | 市第六人民医院   | 冯艳梅 | 15 | 2016.12.1-2018.11.30 |
| 233 | 16CR4028A | 探索剖宫产后子宫切口憩室适宜诊断方法和有效手术治疗的研究                    | 市第一妇婴保健院  | 汪希鹏 | 15 | 2016.12.1-2018.11.30 |

|     |           |                            |           |     |    |                      |
|-----|-----------|----------------------------|-----------|-----|----|----------------------|
| 234 | 16CR4029A | 影像学新技术对骨质疏松患者精准诊断和疗效评估的研究  | 市第十人民医院   | 汤光宇 | 15 | 2016.12.1-2018.11.30 |
| 235 | 16CR4030A | 癌痛筛查和规范化治疗适宜技术的推广          | 第九人民医院    | 姜斌  | 15 | 2016.12.1-2018.11.30 |
| 236 | 16CR4031A | 下腰痛康复治疗适宜技术的研发与推广          | 岳阳中西医结合医院 | 张宏  | 15 | 2016.12.1-2018.11.30 |
| 237 | 16CR4032A | 儿童慢性咳嗽中医综合诊疗方案规范化研究及推广应用   | 龙华医院      | 姜永红 | 15 | 2016.12.1-2018.11.30 |
| 238 | 16CR4033A | 乳腺癌保乳手术与保乳联合乳房成形手术的对比和推广应用 | 第九人民医院    | 郭善禹 | 15 | 2016.12.1-2018.11.30 |
| 239 | 16CR4034A | 二氧化碳点阵激光联合局部用药治疗甲真菌病       | 同济医院      | 赵敬军 | 15 | 2016.12.1-2018.11.30 |

注：1-38为“重大疾病临床技能提升项目”；39-86为“疑难疾病精准诊治攻关项目”；87-205为“专科疾病临床五新转化项目”；206-239为“常见疾病适宜技术研发与推广应用项目”。
